# Supplementary material
Source: Research Square preprint supplement (doi:10.21203/rs.3.rs-9699065/v1)
Supplement: Supplementary file 1 [file c194d3dd317f5273c330b2da.docx]

**Supplementary document**

**A Framework to Develop High-Resolution Intensity–Duration–Frequency Curves:**

**Historical Analysis and Scaling Relationships Integrating Gauge and**

**Gridded Rainfall Products**

**Yaswanth Pulipati a, Balaji Narasimhan*a,C. Balajib**

aHydraulics and Water Resources Engineering Division, Department of

Civil Engineering, IIT Madras, Chennai, India

bDepartment of Mechanical Engineering and Centre for Atmospheric and Climate Sciences, IIT Madras, Chennai, India

**S1. Gridded Rainfall Products from Satellite Retrievals**

The Gridded Rainfall Products (GRPs) from different sources used in the present study are shown in Table 1 and briefly described here:

- The Integrated Multi-Satellite Retrievals (IMERG) for GPM products (Pradhan et al. 2022) are available at a quasi-global scale (60°N–60°S). After the success of Tropical Rainfall Measuring Mission (TRMM), the NASA and JAXA launched Global Precipitation Measurement (GPM.) Core Observatory satellite in early 2014, which can provide half-hourly rain rates. The algorithm designed to produce GPM IMERG rainfall estimates integrates TRMM Multi-satellite Precipitation Analysis (TMPA), CMORPH and PERSSIAN satellite retrievals. The current study utilized GPM product final run version V06 available at half-hourly at 0.1° × 0.1° spatial resolution from the year 2001 to 2020.
- Global Satellite Mapping of Precipitation (GSMaP) precipitation data developed by Japan Science and Technology Agency (JSTA) (Okamoto et al., 2005; Noor et al.,2020) is available in two versions: 1) GSMaP near-real-time developed by using passive microwave radiometers and cloud motion vectors acquired from infrared images 2) GSMaP gauge corrected, obtained by adjusting GSMaP_NRT data utilizing precipitation data from Climate Prediction Center (CPC) (Noor et al., 2020). GSMaP gauge corrected precipitation data available at an hourly temporal scale from the year 2001 to the year 2020 is selected in the current study.
- Precipitation Estimation from Remotely Sensed Information using Artificial Neural Networks-Cloud Classification System-Climate Data Record (PERSIANN-CCS-CDR denoted as PCCSCDR in the current study) provides precipitation estimates over the global domain (60°S to 60°N) at fine temporal (3-hour) and spatial scale (0.04°× 0.04°). The PCCSCDR rainfall data is developed from GridSat-B1 infrared images and is available from the year 1983 (Sadeghi et al. 2021). PCCSCDR rainfall estimates from the year 1983 to the year 2020 are selected in this study.
- Multi-Source Weighted-Ensemble Precipitation (MSWEP) (Beck et al. 2017, 2019b) is a global precipitation data from 1979 at 3-hour temporal and 0.1° spatial resolution. MSWEP merges precipitation data from multiple sources, gauges, satellites and reanalysis, performing better than other gridded precipitation products (Beck et al. 2019a). The current study selects precipitation data from MSWEP version 2.8 available at a 3-hour temporal resolution from 1979 to 2020.

**S2 Performance metrics and Goodness of Fit test**

The current study uses performance metrics: mean error (ME), root mean square error (RMSE), percent bias (PBias), and mean absolute error (MAE), correlation coefficient (CC), Index of Agreement (IA), and Kling-Gupta efficiency (KGE), to quantify the degree of closeness between two datasets. The performance metrics are represented in the following equations.

(6)

(7)

(8)

(9)

(10)

(11)

(12)

Where is the number of gauge stations, and are the estimated and observed data at station , respectively.

The above performance metrics are used to assess the adequacy of probability distribution functions (PDFs) in modeling AMS data and the degree of agreement between gauge and satellite rainfall estimates. The goodness-of-fit test, namely the Anderson-Darling and Kolmogorov–Smirnov statistical tests (De Michele and Avanzi, 2018), are also selected to determine whether the AMS rainfall data fit the extreme value distribution.

**S3. K-means clustering**

K-means clustering is an unsupervised machine learning algorithm randomly distributing the data to k-clusters with k-arbitrary centroids/cluster centers. Each data point is then assigned to the nearest cluster center based on the Euclidian distance between the data point and the k-center. The new centroids are identified for each cluster by finding the mean of all data points in a cluster. The algorithm tries to reduce the goal function given as

where the represents the square of the Euclidian distance between data point and cluster . The data points are assigned to the new closest centroids and this process is repeated until the points converge and no change in the centroids is observed. The selection of the number of clusters is pre-determined and silhouette width is used in the current study to specify the optimum number of clusters. The silhouette coefficient or silhouette score measures a data point's similarity (closeness) within a cluster compared to its nearest clusters (separation). The silhouette coefficient of all the data points in a cluster is the mean silhouette score for that cluster. It is proposed by Rousseeuw (1987) as in which

represents the Silhouette coefficient of data point; is the average distance of data point with the other data points in the same cluster; is the average distance of data point with the data point in the nearest cluster. The silhouette score ranges from -1 to 1; a value closer to 1 indicates a better score and a negative score shows that the data is assigned to a incorrect cluster.

**S4. Property of scale- invariance to derive d-duration return levels**

The scaling and multi-scaling properties of rainfall have been applied in past studies (Chandra et al. 2015a; Yeo et al. 2021) to develop IDF curves. Since the fundamental premise is that quantiles and moments of any order are scale-invariant, through this approach, it is possible to derive distribution properties of other durations using the daily rainfall data. Further, absence of hourly rainfall data from the climate models is a major challenge in determining how the IDF relationship will change in the future. This limitation prompted the development of deterministic and stochastic techniques for estimating rainfall statistics from daily to sub-daily time scales. One of the simplest yet most accurate methods is the scale-invariance model, which has been employed successfully in earlier studies (Chandra et al. 2015b; Adarsh and Janga Reddy 2018) .

Let be a function of a random variable . The function is said to exhibit *scaling behavior* if remains proportional to for all positive scaling factors . Mathematically, this relationship can be expressed as ,where represents the scaling exponent. This relationship indicates that the probability distribution of rainfall remains statistically similar across two different temporal scales, a property known as strict-sense simple scaling. Consequently, the statistical measures such as raw moments and quantiles of any order also demonstrate scale invariance, which can be expressed as

In this context, indicates the **order of the moment**. The order non-central moment (NCM) of the Generalized Extreme Value (GEV) distribution is formulated as follows:

where denote GEV distribution parameters and is the gamma function. Based on the principle of scaling invariance, the statistical characteristics of the GEV distribution corresponding to two different time durations and are connected through following relationships.

where denotes the rainfall intensity for a T-year return period obtained using the following equation

Hence, the relationship between the order non-central moments (NCMs) and the time durations, expressed in a power-law form, can serve to investigate the scaling behavior of extreme rainfall. When extreme rainfall exhibits scaling properties, the data will follow a log-linear trend. The scaling exponent, , can then be determined by plotting the NCMs against the corresponding durations on a log-log graph, using the following formula:

where and denote the first-order non-central moments (NCMs) corresponding to and durations respectively. Once the scaling behavior is assessed, the scaling exponent can be applied to estimate return levels for shorter durations.

The scaling exponent *λ* is used to characterize how normalized central moments (NCMs) of rainfall or other geophysical data change with aggregation duration. The following steps outline a systematic approach to estimating *λ*:

1. **Calculation of NCMs:**

Compute the first three normalized central moments, denoted as

1. **Scaling Plot and Exponent Extraction:**
   - Represent the obtained NCMs as a function of duration on a log-log scale.
   - The scaling exponent *λ* can be determined from the relation:

here  is the scaling factor,

**3. Assessment of Scaling Behavior:**

- Examine the log-log plot of non-central moments (NCMs) versus rainfall duration for linearity; a strong linear trend indicates power-law scaling.
- Estimate individual scaling exponents as the slopes of the linear fits for each moment order ().
- To confirm simple scaling (where the exponent is independent of q), construct a secondary plot of these slopes (y-axis) against moment order q (x-axis).
- Perform linear regression on this slope-vs-q plot (forcing the intercept through the origin). If the relationship is strongly linear (R² ≥ 0.96) with a constant slope η across all stations, it confirms simple scaling; the value of η (the fitted slope) represents the scaling exponent λ, remaining effectively constant for different q values. Deviations from linearity would indicate multi-scaling behavior.

**4. Application of the Scaling Exponent:**

Once the scaling behavior has been established and the exponent *λ* has been determined, use *λ* to estimate return levels for shorter durations based on the scaling relationships identified.

**S5. Evaluation of GRPs with SRRG stations**

While daily rainfall data is available from the dense network of stations, the hourly data is available from 91 SRRG stations after satisfying the conditions of the data quality check mentioned in section 2.3. The GRPs grids collocated to the 91 SRRG stations are selected for the performance assessment. It is important to note that the AMS data vary in sample size across different products, and the gauge-based observations are being compared with gri

Adarsh S, Janga Reddy M (2018) Developing hourly intensity duration frequency curves for urban areas in India using multivariate empirical mode decomposition and scaling theory. Stoch Environ Res Risk Assess 32:1889–1902. https://doi.org/10.1007/s00477-018-1545-x

Agbazo M, Koton’Gobi G, Kounouhewa B, et al (2016) Estimación de las curvas IDF de extrema precipitación por escala simple en el Valle Oueme, al Norte de la República de Benín (Africa occidental). Earth Sci Res J 20:D1–D7. https://doi.org/10.15446/esrj.v20n1.49405

Bairwa AK, Khosa R, Maheswaran R (2016) Developing intensity duration frequency curves based on scaling theory using linear probability weighted moments: A case study from India. J Hydrol 542:850–859. https://doi.org/10.1016/j.jhydrol.2016.09.056

Beck HE, Pan M, Roy T, et al (2019a) Daily evaluation of 26 precipitation datasets using Stage-IV gauge-radar data for the CONUS. Hydrol Earth Syst Sci 23:207–224. https://doi.org/10.5194/hess-23-207-2019

Beck HE, Van Dijk AIJM, Levizzani V, et al (2017) MSWEP: 3-hourly 0.25° global gridded precipitation (1979-2015) by merging gauge, satellite, and reanalysis data. Hydrol Earth Syst Sci 21:589–615. https://doi.org/10.5194/hess-21-589-2017

Beck HE, Wood EF, Pan M, et al (2019b) MSWep v2 Global 3-hourly 0.1° precipitation: Methodology and quantitative assessment. Bull Am Meteorol Soc 100:473–500. https://doi.org/10.1175/BAMS-D-17-0138.1

Bonaccorso B, Brigandì G, Aronica GT (2020) Regional sub-hourly extreme rainfall estimates in Sicily under a scale invariance framework Content courtesy of Springer Nature , terms of use apply . Rights reserved . Content courtesy of Springer Nature , terms of use apply . Rights reserved . 4363–4380

Chandra R, Saha U, Mujumdar PP (2015a) Model and parameter uncertainty in IDF relationships under climate change. Adv Water Resour 79:127–139. https://doi.org/10.1016/j.advwatres.2015.02.011

Chandra R, Saha U, Mujumdar PP (2015b) Model and parameter uncertainty in IDF relationships under climate change. Adv Water Resour 79:127–139. https://doi.org/10.1016/j.advwatres.2015.02.011

Ghanmi H, Bargaoui Z, Mallet C (2016) Estimation of intensity-duration-frequency relationships according to the property of scale invariance and regionalization analysis in a Mediterranean coastal area. J Hydrol 541:38–49. https://doi.org/10.1016/j.jhydrol.2016.07.002

Nguyen TH, Nguyen VT Van (2020) Linking climate change to urban storm drainage system design: An innovative approach to modeling of extreme rainfall processes over different spatial and temporal scales. J Hydro-Environment Res 29:80–95. https://doi.org/10.1016/j.jher.2020.01.006

Pradhan RK, Markonis Y, Vargas Godoy MR, et al (2022) Review of GPM IMERG performance: A global perspective. Remote Sens Environ 268:112754. https://doi.org/10.1016/j.rse.2021.112754

Sadeghi M, Nguyen P, Naeini MR, et al (2021) PERSIANN-CCS-CDR, a 3-hourly 0.04° global precipitation climate data record for heavy precipitation studies. Sci Data 8:1–11. https://doi.org/10.1038/s41597-021-00940-9

Yeo MH, Nguyen VT Van, Kpodonu TA (2021) Characterizing extreme rainfalls and constructing confidence intervals for IDF curves using Scaling-GEV distribution model. Int J Climatol 41:456–468. https://doi.org/10.1002/joc.6631
